# Supplementary material
Source: PubMed Central journal article supplement (PMC7983492)
Supplement: NIHMS1547810-supplement-1.pdf [file NIHMS1547810-supplement-1.pdf]

## DISTINCT RISK PROFILES IN SOCIAL ANXIETY DISORDER

42

## Supplemental Table S1

*Fit Statistics for 8-Indicator Latent Class Analyses*

| <b>Model</b> | <b>Log-Likelihood</b> | <b>Parameters</b> | <b>AIC</b> | <b>BIC</b> | <b>Adj. BIC</b> | <b>Entropy</b> | <b>LMR p-value</b> |
|--------------|-----------------------|-------------------|------------|------------|-----------------|----------------|--------------------|
| 1 class      | -22299.016            | 16                | 44630.031  | 44704.122  | 44653.315       |                |                    |
| 2 class      | -21854.825            | 25                | 43759.651  | 43875.418  | 43796.033       | .863           | .0000              |
| 3 class      | -21624.082            | 34                | 43316.164  | 43473.608  | 43365.643       | .839           | .0009              |
| 4 class      | -21483.752            | 43                | 43053.503  | 43252.622  | 43116.079       | .861           | .0636              |
| 5 class      | -21380.757            | 52                | 42865.515  | 43106.310  | 42941.189       | .834           | .0023              |
| 6 class      | -21300.904            | 61                | 42723.808  | 43006.279  | 42812.579       | .842           | .1827              |
| 7 class      | -21243.870            | 70                | 42627.740  | 42951.888  | 42729.609       | .845           | .1655              |
| 8 class      | *                     |                   |            |            |                 |                |                    |

*Fit Statics for 3 Factor Scores Latent Class Analyses*

|         |           |    |           |           |           |      |       |
|---------|-----------|----|-----------|-----------|-----------|------|-------|
| 2 class | -6592.266 | 10 | 13204.531 | 13250.838 | 13219.084 | .783 | .0000 |
| 3 class | -6552.780 | 14 | 13133.559 | 13198.389 | 13153.933 | .746 | .0694 |
| 4 class | -6529.266 | 18 | 13094.533 | 13177.885 | 13120.727 | .684 | .1824 |
| 5 class | -6502.289 | 22 | 13048.579 | 13150.454 | 13080.595 | .724 | .0359 |

*Note.* \* Best log likelihood was not replicated. AIC = Akaike information criterion; BIC =

Bayesian information criterion; Adj. BIC = Adjusted Bayesian information criterion; LMR = Lo-

Mendell-Rubin adjusted likelihood ratio test *p* value.

## Supplemental Figure S1

*Latent Class Analysis Graphs*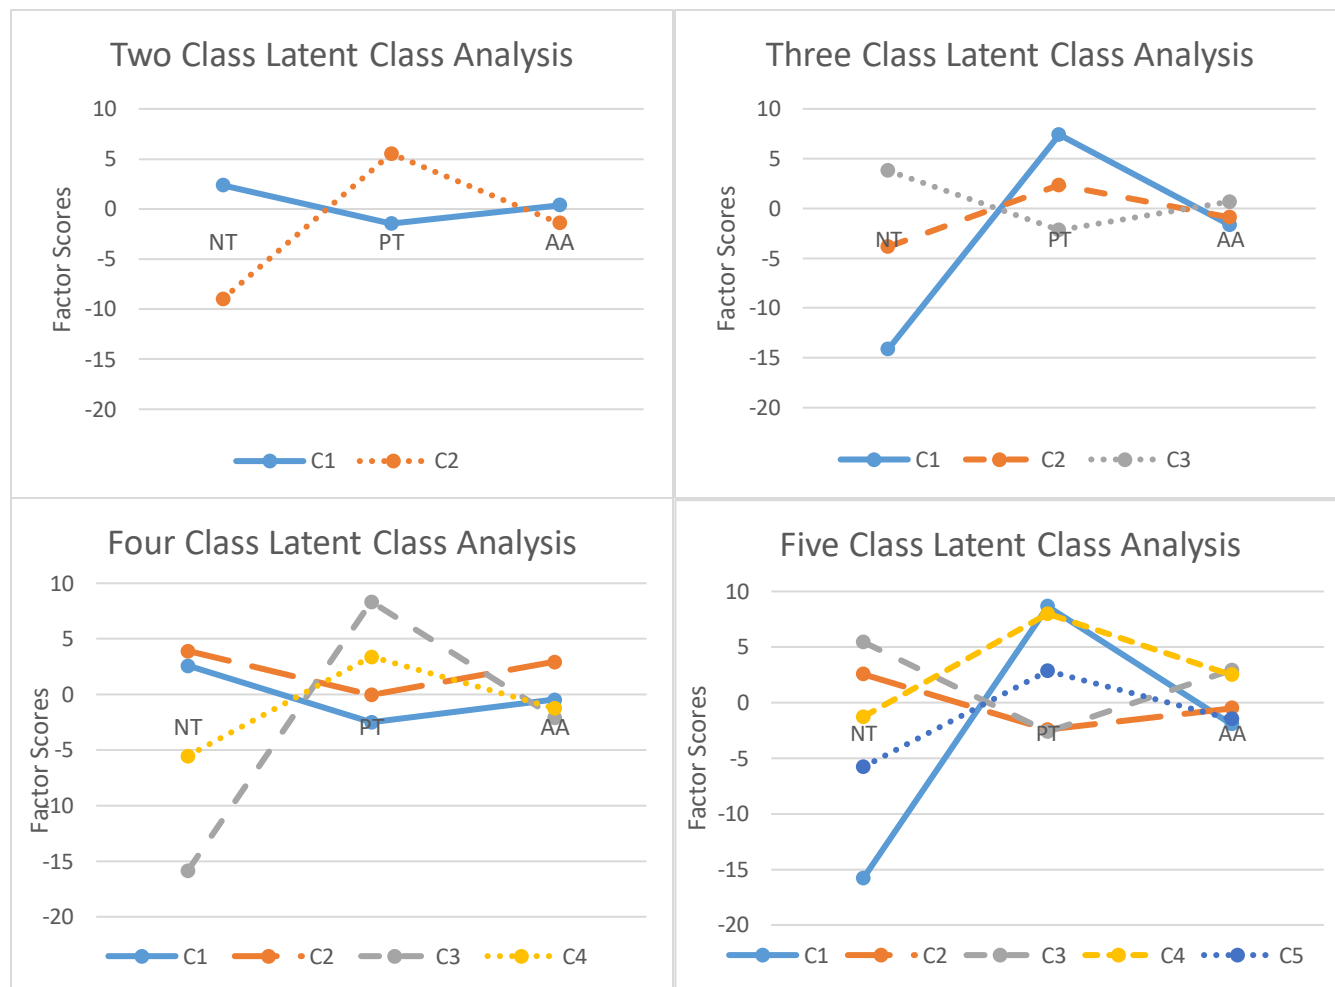

*Note.* NT = neurotic temperament, PT = positive temperament; AA = autonomic arousal; C1 =

Class 1; C2 = Class 2; C3 = Class 3; C4 = Class 4; C5 = Class 5.

## DISTINCT RISK PROFILES IN SOCIAL ANXIETY DISORDER

44

## Supplemental Table S2

*Observed Means for Final Solution*

|                             | <b>Class<br/>Membership</b> | <b>Mean</b> | <b>SD</b> |
|-----------------------------|-----------------------------|-------------|-----------|
| <b>Neurotic Temperament</b> |                             |             |           |
| NFFIN                       | 1                           | 35.67       | 6.53      |
|                             | 2                           | 32.56       | 8.30      |
| EPNEUR                      | 1                           | 9.53        | 2.32      |
|                             | 2                           | 8.74        | 2.90      |
| BIS                         | 1                           | 25.80       | 2.41      |
|                             | 2                           | 25.06       | 3.04      |
| <b>Positive Temperament</b> |                             |             |           |
| NFFIE                       | 1                           | 15.77       | 5.79      |
|                             | 2                           | 24.87       | 6.60      |
| EPEXTR                      | 1                           | 0.33        | 0.47      |
|                             | 2                           | 4.17        | 1.99      |
| BAS                         | 1                           | 33.54       | 6.32      |
|                             | 2                           | 38.25       | 5.92      |
| <b>Autonomic Arousal</b>    |                             |             |           |
| DASANX-AA                   | 1                           | 4.08        | 3.24      |
|                             | 2                           | 3.77        | 3.10      |
| BAI-AA                      | 1                           | 16.33       | 9.92      |
|                             | 2                           | 16.89       | 10.01     |
| DASANX                      | 1                           | 6.74        | 4.47      |
|                             | 2                           | 6.40        | 4.35      |
| BAI                         | 1                           | 49.61       | 11.48     |
|                             | 2                           | 20.22       | 11.75     |

*Note.* NFFIN = NEO-Five Factor Inventory Neuroticism Scale (scores range from 0 to 48); EPNEUR = Eysenck Personality Questionnaire Neuroticism Scale; BIS = Behavioral Inhibition Scale; NFFIE = NEO-Five Factor Inventory Extraversion Scale (scores range from 0 to 48); EPEXTR = Eysenck Personality Questionnaire Extraversion Scale; BAS = Behavioral Activation scale; DASANX-AA = Autonomic arousal items of Depression Anxiety Stress Scales Anxiety Scale (scores range from 0 to 30); BAI-AA = Autonomic arousal items of Beck Anxiety Inventory; DASANX = Depression Anxiety Stress Scales Anxiety Scale (scores range from 0 to 42); BAI = Beck Anxiety Inventory.
